# Supplementary material
Source: HighWire-hosted journal article supplement (https://bmjopenquality.bmj.com/highwire/filestream/145648/field_highwire_adjunct_files/0/bmjoq-2022-002194supp001_data_supplement.pdf)
Supplement: bmjoq-2022-002194supp001_data_supplement.pdf [file bmjoq-2022-002194supp001_data_supplement.pdf]

Appendix 1

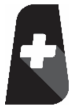

Saskatchewan  
Health Authority

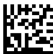

Patient Label

NAME: \_\_\_\_\_

HSN: \_\_\_\_\_

D.O.B.: \_\_\_\_\_

☐ RUH ☐ SCH ☐ SPH ☐ Other \_\_\_\_\_

ADULT EARLY WARNING SYSTEM (EWS)

VITAL SIGNS RECORD

Page 1 of 2

|                                                                                 |                                       |            |   |  |  |  |  |  |  |  |  |  |  |  |  |  |  |  |  |
|---------------------------------------------------------------------------------|---------------------------------------|------------|---|--|--|--|--|--|--|--|--|--|--|--|--|--|--|--|--|
| Date                                                                            |                                       |            |   |  |  |  |  |  |  |  |  |  |  |  |  |  |  |  |  |
| Time                                                                            |                                       |            |   |  |  |  |  |  |  |  |  |  |  |  |  |  |  |  |  |
| Initials                                                                        |                                       |            |   |  |  |  |  |  |  |  |  |  |  |  |  |  |  |  |  |
| Blood Pressure (mmHg)<br>*Document systolic/diastolic                           | Score ONLY based on systolic          | 181+       | 3 |  |  |  |  |  |  |  |  |  |  |  |  |  |  |  |  |
|                                                                                 |                                       | 161-180    | 1 |  |  |  |  |  |  |  |  |  |  |  |  |  |  |  |  |
|                                                                                 |                                       | 100-160    | 0 |  |  |  |  |  |  |  |  |  |  |  |  |  |  |  |  |
|                                                                                 |                                       | 90-99      | 1 |  |  |  |  |  |  |  |  |  |  |  |  |  |  |  |  |
|                                                                                 |                                       | 89 or less | 3 |  |  |  |  |  |  |  |  |  |  |  |  |  |  |  |  |
| Temperature<br>• – Oral<br>Ax – Axilla<br>R – Rectal<br>E – Ear<br>T – Temporal | 38.3°C+                               |            | 3 |  |  |  |  |  |  |  |  |  |  |  |  |  |  |  |  |
|                                                                                 | 37.6-38.2°C                           |            | 2 |  |  |  |  |  |  |  |  |  |  |  |  |  |  |  |  |
|                                                                                 | 36.1-37.5°C                           |            | 0 |  |  |  |  |  |  |  |  |  |  |  |  |  |  |  |  |
|                                                                                 | 35.1-36.0°C                           |            | 2 |  |  |  |  |  |  |  |  |  |  |  |  |  |  |  |  |
|                                                                                 | 35°C or less                          |            | 3 |  |  |  |  |  |  |  |  |  |  |  |  |  |  |  |  |
| Heart Rate                                                                      | 131+                                  |            | 3 |  |  |  |  |  |  |  |  |  |  |  |  |  |  |  |  |
|                                                                                 | 101-130                               |            | 1 |  |  |  |  |  |  |  |  |  |  |  |  |  |  |  |  |
|                                                                                 | 61-100                                |            | 0 |  |  |  |  |  |  |  |  |  |  |  |  |  |  |  |  |
|                                                                                 | 41-60                                 |            | 1 |  |  |  |  |  |  |  |  |  |  |  |  |  |  |  |  |
|                                                                                 | 40 or less                            |            | 3 |  |  |  |  |  |  |  |  |  |  |  |  |  |  |  |  |
| Respiratory Rate                                                                | 28+                                   |            | 3 |  |  |  |  |  |  |  |  |  |  |  |  |  |  |  |  |
|                                                                                 | 21-27                                 |            | 1 |  |  |  |  |  |  |  |  |  |  |  |  |  |  |  |  |
|                                                                                 | 12-20                                 |            | 0 |  |  |  |  |  |  |  |  |  |  |  |  |  |  |  |  |
|                                                                                 | 9-11                                  |            | 1 |  |  |  |  |  |  |  |  |  |  |  |  |  |  |  |  |
|                                                                                 | 8 or less                             |            | 3 |  |  |  |  |  |  |  |  |  |  |  |  |  |  |  |  |
| Oxygen Saturation                                                               | 96%+ (COPD 88-92)                     |            | 0 |  |  |  |  |  |  |  |  |  |  |  |  |  |  |  |  |
|                                                                                 | 91-95%                                |            | 1 |  |  |  |  |  |  |  |  |  |  |  |  |  |  |  |  |
|                                                                                 | 90% or less despite O <sub>2</sub>    |            | 3 |  |  |  |  |  |  |  |  |  |  |  |  |  |  |  |  |
| Oxygen Delivery                                                                 | Room air                              |            | 0 |  |  |  |  |  |  |  |  |  |  |  |  |  |  |  |  |
|                                                                                 | Supplemental O <sub>2</sub> (L/min)   |            | 1 |  |  |  |  |  |  |  |  |  |  |  |  |  |  |  |  |
|                                                                                 | Not responding to supplemental oxygen |            | 2 |  |  |  |  |  |  |  |  |  |  |  |  |  |  |  |  |
| Level of Consciousness (LOC)                                                    | Alert/Normal sleep                    |            | 0 |  |  |  |  |  |  |  |  |  |  |  |  |  |  |  |  |
|                                                                                 | Drowsy; easy to rouse                 |            | 1 |  |  |  |  |  |  |  |  |  |  |  |  |  |  |  |  |
|                                                                                 | New onset of confusion                |            | 1 |  |  |  |  |  |  |  |  |  |  |  |  |  |  |  |  |
|                                                                                 | Somnolent; difficult to rouse         |            | 3 |  |  |  |  |  |  |  |  |  |  |  |  |  |  |  |  |
| EWS Score                                                                       |                                       |            |   |  |  |  |  |  |  |  |  |  |  |  |  |  |  |  |  |
| See Progress Notes (✓)                                                          |                                       |            |   |  |  |  |  |  |  |  |  |  |  |  |  |  |  |  |  |
| Pain Scale (0-10)                                                               |                                       |            |   |  |  |  |  |  |  |  |  |  |  |  |  |  |  |  |  |
| Sedation Score (S, 1, 2, 3, 4)                                                  |                                       |            |   |  |  |  |  |  |  |  |  |  |  |  |  |  |  |  |  |
| Sensory Levels                                                                  | Right                                 |            |   |  |  |  |  |  |  |  |  |  |  |  |  |  |  |  |  |
|                                                                                 | Left                                  |            |   |  |  |  |  |  |  |  |  |  |  |  |  |  |  |  |  |
| Motor Function (0, 1, 2)                                                        |                                       |            |   |  |  |  |  |  |  |  |  |  |  |  |  |  |  |  |  |
| Weight (kg)                                                                     |                                       |            |   |  |  |  |  |  |  |  |  |  |  |  |  |  |  |  |  |
| Stool                                                                           |                                       |            |   |  |  |  |  |  |  |  |  |  |  |  |  |  |  |  |  |

## ADULT EARLY WARNING SYSTEM (EWS) VITAL SIGNS RECORD

Page 2 of 2

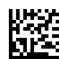

Patient Label

NAME: \_\_\_\_\_

HSN: \_\_\_\_\_

D.O.B.: \_\_\_\_\_

### EWS Escalation Process:

Refer to and follow this algorithm every time a patient is scored.

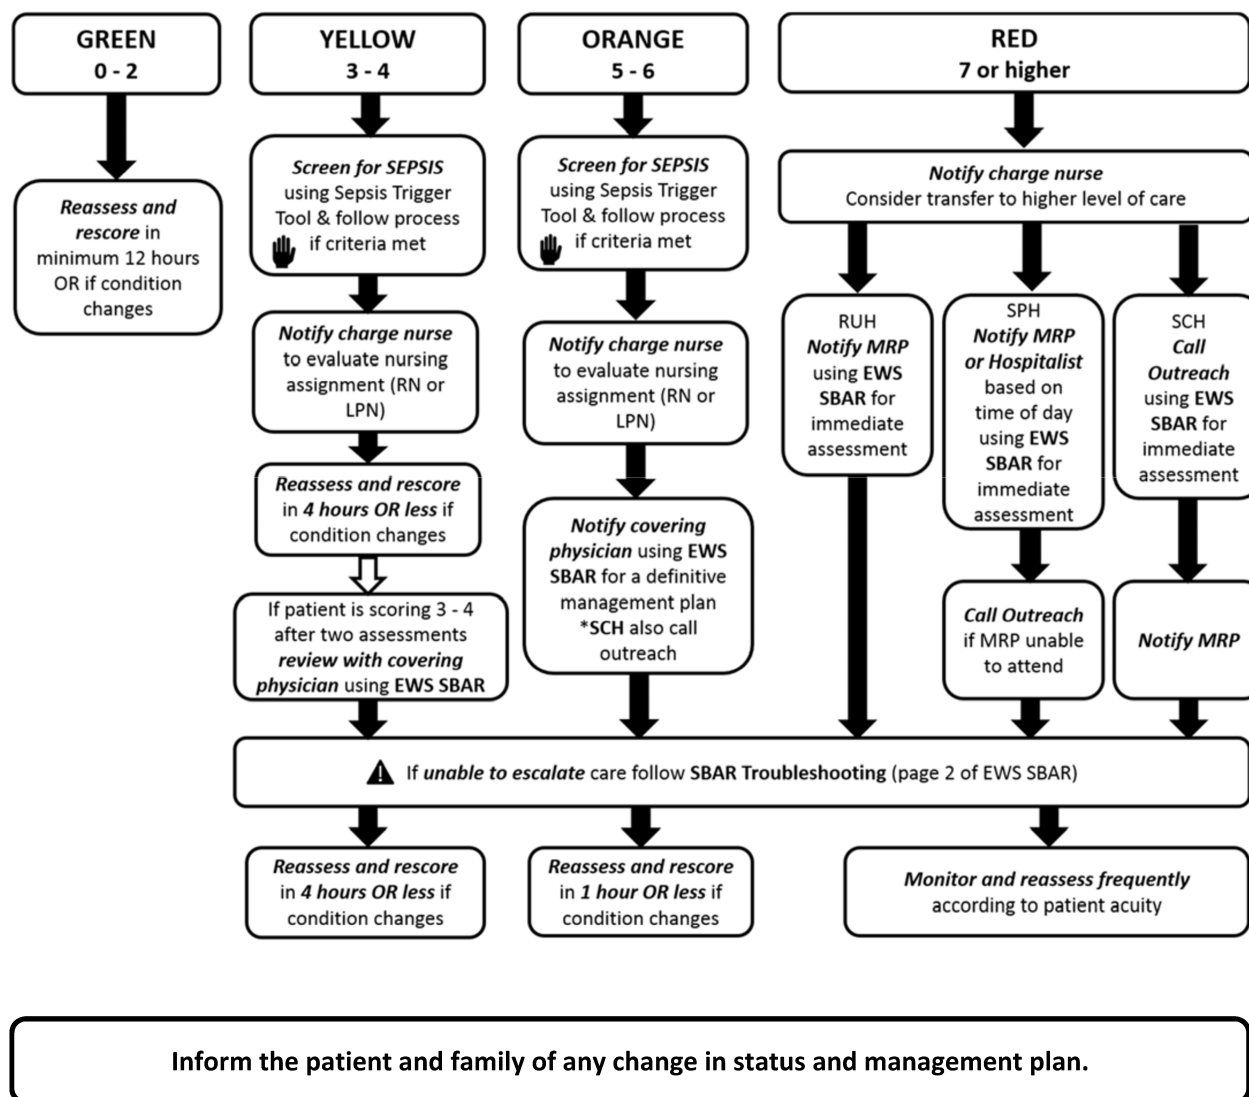

**NOTE:** Frequency of observations can be increased at the discretion of the clinical team. Concern about the patient should lead to escalation regardless of score.
